# Supplementary material
Source: Springer Nature journal article supplement (https://www.springermedizin.de/resource/supplementary/12891_2012_1661_MOESM2_ESM.pdf/9509100)
Supplement: MOESM2 [file 9509100]

## APPENDIX B

- B.1. Position/Worker Specific Data Form .....**
- B.2. Job Summary Data Form.....**
- B.3. Job Specific Data Form .....**
- B.4. Lifting/Lowering Steady Data Form .....**
- B.5. Lifting/Lowering Variable Data Form.....**
- B.6. Pushing/Pulling Data Form.....**
- B.7. Walking/Carrying Data Form .....**
- B.8. Lifting/Lowering Tasks Data Form.....**
- B.9. Pushing/Pulling Tasks Data Form.....**
- B.10. Walking/Carrying Tasks Data Form .....**

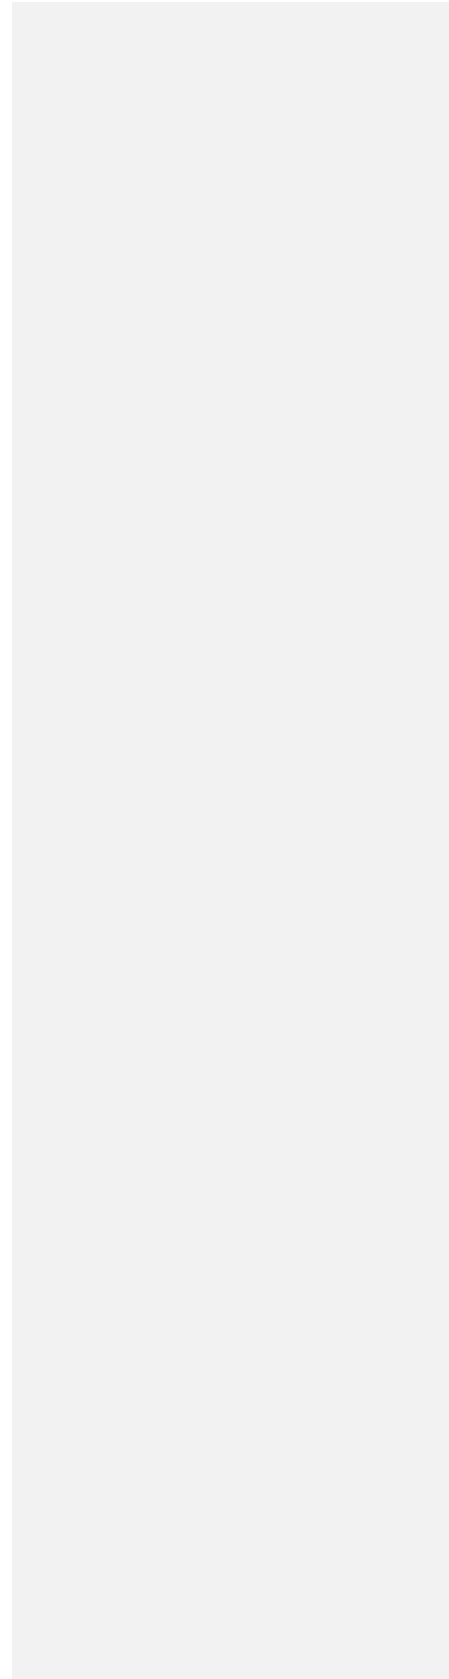

**B.1. Position/Worker Specific Data Form**

**Position / Worker Specific Data Form (Form A)**

1. Subject I.D. \_\_\_\_\_ <AA0001>      6. Date: \_\_\_\_\_ <MM / DD / YYYY>  
 2. Subject Name: \_\_\_\_\_      7. Time (24hr): \_\_\_\_\_ <2:30 pm - 14:30, midnight = 00:00>  
 3.  Male  Female      4. Age: \_\_\_\_\_ <years>      8. Analyst #1: \_\_\_\_\_  
 5. Facility: \_\_\_\_\_      9. Analyst #2: \_\_\_\_\_

**Position Information**

10. Line / Department Title: \_\_\_\_\_  
 11. Position Title: \_\_\_\_\_  
 12. Position Description: \_\_\_\_\_  
 \_\_\_\_\_  
 \_\_\_\_\_  
 \_\_\_\_\_

13. Typical Shift **Start** Time (24hr): \_\_\_\_\_      17. Average Work **Hours/Week**: \_\_\_\_\_  
 14. Typical Shift **End** Time (24hr): \_\_\_\_\_      18. Maximum Work **Hours/Week**: \_\_\_\_\_  
 15. Break-Time (Minutes/day): \_\_\_\_\_ <Total of Lunch & Breaks / Day> Minutes      19. Average Work **Days/Week**: \_\_\_\_\_  
 16. # of **Distinct** Jobs Rotated to: \_\_\_\_\_      20. Maximum Work **Days/Week**: \_\_\_\_\_  
 21. Note Unusual Schedule Here: \_\_\_\_\_  
 \_\_\_\_\_

22. Jobs Included in Position:

| Job # | Job Title/Description | PACE Self, Line, Piece Rate | LBS/Rotation (lb/t) | Continuous Duration (Hours, t) | Total Hours/Day (Σt, Hours) | Typical Work % of Week | # of Times/ Month (Peak Exposures Only) |
|-------|-----------------------|-----------------------------|---------------------|--------------------------------|-----------------------------|------------------------|-----------------------------------------|
| 1     |                       | S L P                       |                     |                                |                             |                        |                                         |
| 2     |                       | S L P                       |                     |                                |                             |                        |                                         |
| 3     |                       | S L P                       |                     |                                |                             |                        |                                         |
| 4     |                       | S L P                       |                     |                                |                             |                        |                                         |
| 5     |                       | S L P                       |                     |                                |                             |                        |                                         |
| 6     |                       | S L P                       |                     |                                |                             |                        |                                         |
| 7     |                       | S L P                       |                     |                                |                             |                        |                                         |
| 8     |                       | S L P                       |                     |                                |                             |                        |                                         |

## B.2. Job Summary Data Form

Subject ID: \_\_\_\_\_

### **Worker Information**

23. Prior Work Experience; Maximum of 10 Years **OR** Maximum of 5 Jobs!  
 (Include Current Position and *significantly* different prior positions with *present* employer first)

| Position | Title / Description | Years | Average Low Back Borg Rating |
|----------|---------------------|-------|------------------------------|
| Current  |                     |       |                              |
| Prior #1 |                     |       |                              |
| Prior #2 |                     |       |                              |
| Prior #3 |                     |       |                              |
| Prior #4 |                     |       |                              |
| Prior #5 |                     |       |                              |

24. Do you currently work on a second job outside of this facility? Yes No

25. If Yes, 2<sup>nd</sup> Job Title/Description: \_\_\_\_\_

26. Average Hours/Week on 2<sup>nd</sup> Job: \_\_\_\_\_ 27. Number of Years on 2<sup>nd</sup> Job: \_\_\_\_\_

28. Low Back Overall (Average) Borg Rating for 2<sup>nd</sup> Job: \_\_\_\_\_

29. Overall Worker Rating at **Beginning** of Shift<sup>3</sup> (Borg CR-10)

30. Overall Worker Rating at **End** of Shift<sup>3</sup> (Borg CR-10)

| Worker Estimated Rating (Stress)<br>(Low Back Only) | Worker Rating @ Beg/End (Stress)<br>(Low Back Only) |
|-----------------------------------------------------|-----------------------------------------------------|
|                                                     |                                                     |
|                                                     |                                                     |

31. Analyst Notes (Optional): \_\_\_\_\_

\_\_\_\_\_

\_\_\_\_\_

\_\_\_\_\_

## Job Summary Data Form (Form B)

1. Subject I.D. \_\_\_\_\_ 2. Job # (From "Position Data Form, Field #22"): \_\_\_\_\_  
<From Position Form, Field #1>
3. Facility: \_\_\_\_\_ 4. Date: \_\_\_\_\_  
<MM / DD / YYYY>

5. Data Form Inventory

| Data Form 'Name'                | Form 'Letter' | Not Used | # of TOTAL Pages |
|---------------------------------|---------------|----------|------------------|
| Job Specific Data Form          | C             |          | 1                |
| Steady State Lifting/Lowering   | D             |          |                  |
| Variable State Lifting/Lowering | E             |          |                  |
| Pushing/Pulling                 | F             |          |                  |
| Walking/Carrying/Holding        | G             |          |                  |

6. Summary Notes/Data (include "to-do" for analysis and "issues" with data):

7. Jobs Considered Identical for Data Analysis Purposes

| Name | Location | Collected? | Notes: |
|------|----------|------------|--------|
|      |          |            |        |
|      |          |            |        |
|      |          |            |        |
|      |          |            |        |

8. Time Adjustments for Motion Counts / Energy Expenditure

| Tape Code | Video Code | Segment Length | Actual Length | Ratio |
|-----------|------------|----------------|---------------|-------|
|           |            |                |               |       |
|           |            |                |               |       |
|           |            |                |               |       |
|           |            |                |               |       |

9. Motion Counts:  
(Load -> 4lbs/Hand)

|                          | W/ Load | W/O Load |
|--------------------------|---------|----------|
| # Trunk Flexions (≥30°)  |         |          |
| # Trunk Rotations (≥45°) |         |          |
| # Lateral Bend (≥10°)    |         |          |
| # 180° Turns             |         |          |

### B.3. Job Specific Data Form

#### Job Specific Data Form (Form C)

1. Subject I.D. \_\_\_\_\_ 5. Facility: \_\_\_\_\_  
<From Position Form, Field #1>
2. Analyst Name(s): \_\_\_\_\_ 6. Time (24hr): \_\_\_\_\_  
<2:30 pm - 14:30, midnight - 00:00>
3. Observation Time (minutes): \_\_\_\_\_ 7. Date: \_\_\_\_\_  
<MM/DD/YYYY>
4. Job ID (Plant Official): \_\_\_\_\_ 8. Job # (From "Position Data Form, Field #22"): \_\_\_\_\_

#### Job Overview

9. Specify the **Percentage of Time** Spent in EACH of the Sub-Activities Listed Below:

| Manual Material Handling                                           | Assembly<br><small>(Specify Light or Heavy Assembly)</small>                                                                        | Paperwork<br><small>(With or without Computer)</small>             | Fork-Truck Riding                                                  | Resting/Waiting                                                    |
|--------------------------------------------------------------------|-------------------------------------------------------------------------------------------------------------------------------------|--------------------------------------------------------------------|--------------------------------------------------------------------|--------------------------------------------------------------------|
| _____ %                                                            | _____ %                                                                                                                             | _____ %                                                            | _____ %                                                            | _____ %                                                            |
| <input type="checkbox"/> Sitting <input type="checkbox"/> Standing | <input type="checkbox"/> Sitting <input type="checkbox"/> Standing<br><input type="checkbox"/> Light <input type="checkbox"/> Heavy | <input type="checkbox"/> Sitting <input type="checkbox"/> Standing | <input type="checkbox"/> Sitting <input type="checkbox"/> Standing | <input type="checkbox"/> Sitting <input type="checkbox"/> Standing |

10. Specify the **Low-Back Borg CR-10 Rating** for EACH of the Sub-Activities Listed Below:

| Manual Material Handling |         | Assembly |         | Paperwork<br><small>(With or without Computer)</small> |         | Fork-Truck Riding |         | Resting/Waiting |         |
|--------------------------|---------|----------|---------|--------------------------------------------------------|---------|-------------------|---------|-----------------|---------|
| Worker                   | Analyst | Worker   | Analyst | Worker                                                 | Analyst | Worker            | Analyst | Worker          | Analyst |
| CR-10                    | CR-10   | CR-10    | CR-10   | CR-10                                                  | CR-10   | CR-10             | CR-10   | CR-10           | CR-10   |

11. Specify the Single, **Most Stressful Low-Back Task** and Associated Borg CR-10 Rating Below:

| Task | Worker Rating | Analyst Rating |
|------|---------------|----------------|
|      | CR-10         | CR-10          |

12. Worker Postures (Standing + Sitting = 100%; Back Bent and Squatting are expressed as a sub percentage of standing or sitting (i.e. standing = 50%, Back Bent under standing = 100%, means that 100 percent of the time spent standing is in a bent posture.) NOTE: Walking is Counted as Standing

| Standing                              | % | Sitting                               | % |
|---------------------------------------|---|---------------------------------------|---|
| Back Bent<br><small>(&gt;20°)</small> |   | Back Bent<br><small>(&gt;20°)</small> |   |
| %                                     |   | %                                     |   |

13. Worker Exposed to **Whole Body Vibration**: Yes No  
 14. Worker Use of **Anti-Fatigue Mats**: Yes No  
 Anti-Fatigue Mat **Usage Time**: \_\_\_\_\_ %

15. Use of **"Insoles"** in shoes: Yes No  
 16. Worker Uses **Back Belt**: Yes No  
 Back Belt **Available**: Yes No  
 Has Back Belt **Training**: Yes No

17. Floor: Normal Uneven Slippery  
NOTE: Floors can be Uneven & Slippery  
 18. Work Space (MMH): Open Obstructed  
 Type of Obstruction: \_\_\_\_\_

|                                        |          |          |                                     |             |             |
|----------------------------------------|----------|----------|-------------------------------------|-------------|-------------|
| 19. Typical Plant <b>Temperature</b> : | January  | July     | 20. Typical Plant <b>Humidity</b> : | January     | July        |
|                                        | _____ °C | _____ °C |                                     | _____ %R.H. | _____ %R.H. |

### B.4. Lifting/Lowering Steady Data Form

**Lifting/Lowering Steady** (Form D)      **Subject #** \_\_\_\_\_      **Job #** \_\_\_\_\_

**Normal Carry Height** \_\_\_\_\_ in

Object Description: \_\_\_\_\_ Object Location: \_\_\_\_\_

|                                |                |                |               |               |            |               |               |            |
|--------------------------------|----------------|----------------|---------------|---------------|------------|---------------|---------------|------------|
| <input type="checkbox"/> Lift  | <b>W</b> (lbs) | Box Width (in) | $H_{OL}$ (in) | $H_{OR}$ (in) | $V_o$ (in) | $H_{DL}$ (in) | $H_{DR}$ (in) | $V_o$ (in) |
| <input type="checkbox"/> Lower |                |                |               |               |            |               |               |            |

Object Description: \_\_\_\_\_ Object Location: \_\_\_\_\_

|                                |                |                |               |               |            |               |               |            |
|--------------------------------|----------------|----------------|---------------|---------------|------------|---------------|---------------|------------|
| <input type="checkbox"/> Lift  | <b>W</b> (lbs) | Box Width (in) | $H_{OL}$ (in) | $H_{OR}$ (in) | $V_o$ (in) | $H_{DL}$ (in) | $H_{DR}$ (in) | $V_o$ (in) |
| <input type="checkbox"/> Lower |                |                |               |               |            |               |               |            |

Object Description: \_\_\_\_\_ Object Location: \_\_\_\_\_

|                                |                |                |               |               |            |               |               |            |
|--------------------------------|----------------|----------------|---------------|---------------|------------|---------------|---------------|------------|
| <input type="checkbox"/> Lift  | <b>W</b> (lbs) | Box Width (in) | $H_{OL}$ (in) | $H_{OR}$ (in) | $V_o$ (in) | $H_{DL}$ (in) | $H_{DR}$ (in) | $V_o$ (in) |
| <input type="checkbox"/> Lower |                |                |               |               |            |               |               |            |

Object Description: \_\_\_\_\_ Object Location: \_\_\_\_\_

|                                |                |                |               |               |            |               |               |            |
|--------------------------------|----------------|----------------|---------------|---------------|------------|---------------|---------------|------------|
| <input type="checkbox"/> Lift  | <b>W</b> (lbs) | Box Width (in) | $H_{OL}$ (in) | $H_{OR}$ (in) | $V_o$ (in) | $H_{DL}$ (in) | $H_{DR}$ (in) | $V_o$ (in) |
| <input type="checkbox"/> Lower |                |                |               |               |            |               |               |            |

Object Description: \_\_\_\_\_ Object Location: \_\_\_\_\_

|                                |                |                |               |               |            |               |               |            |
|--------------------------------|----------------|----------------|---------------|---------------|------------|---------------|---------------|------------|
| <input type="checkbox"/> Lift  | <b>W</b> (lbs) | Box Width (in) | $H_{OL}$ (in) | $H_{OR}$ (in) | $V_o$ (in) | $H_{DL}$ (in) | $H_{DR}$ (in) | $V_o$ (in) |
| <input type="checkbox"/> Lower |                |                |               |               |            |               |               |            |

Object Description: \_\_\_\_\_ Object Location: \_\_\_\_\_

|                                |                |                |               |               |            |               |               |            |
|--------------------------------|----------------|----------------|---------------|---------------|------------|---------------|---------------|------------|
| <input type="checkbox"/> Lift  | <b>W</b> (lbs) | Box Width (in) | $H_{OL}$ (in) | $H_{OR}$ (in) | $V_o$ (in) | $H_{DL}$ (in) | $H_{DR}$ (in) | $V_o$ (in) |
| <input type="checkbox"/> Lower |                |                |               |               |            |               |               |            |

Object Description: \_\_\_\_\_ Object Location: \_\_\_\_\_

|                                |                |                |               |               |            |               |               |            |
|--------------------------------|----------------|----------------|---------------|---------------|------------|---------------|---------------|------------|
| <input type="checkbox"/> Lift  | <b>W</b> (lbs) | Box Width (in) | $H_{OL}$ (in) | $H_{OR}$ (in) | $V_o$ (in) | $H_{DL}$ (in) | $H_{DR}$ (in) | $V_o$ (in) |
| <input type="checkbox"/> Lower |                |                |               |               |            |               |               |            |

Object Description: \_\_\_\_\_ Object Location: \_\_\_\_\_

|                                |                |                |               |               |            |               |               |            |
|--------------------------------|----------------|----------------|---------------|---------------|------------|---------------|---------------|------------|
| <input type="checkbox"/> Lift  | <b>W</b> (lbs) | Box Width (in) | $H_{OL}$ (in) | $H_{OR}$ (in) | $V_o$ (in) | $H_{DL}$ (in) | $H_{DR}$ (in) | $V_o$ (in) |
| <input type="checkbox"/> Lower |                |                |               |               |            |               |               |            |

Object Description: \_\_\_\_\_ Object Location: \_\_\_\_\_

|                                |                |                |               |               |            |               |               |            |
|--------------------------------|----------------|----------------|---------------|---------------|------------|---------------|---------------|------------|
| <input type="checkbox"/> Lift  | <b>W</b> (lbs) | Box Width (in) | $H_{OL}$ (in) | $H_{OR}$ (in) | $V_o$ (in) | $H_{DL}$ (in) | $H_{DR}$ (in) | $V_o$ (in) |
| <input type="checkbox"/> Lower |                |                |               |               |            |               |               |            |

Object Description: \_\_\_\_\_ Object Location: \_\_\_\_\_

|                                |                |                |               |               |            |               |               |            |
|--------------------------------|----------------|----------------|---------------|---------------|------------|---------------|---------------|------------|
| <input type="checkbox"/> Lift  | <b>W</b> (lbs) | Box Width (in) | $H_{OL}$ (in) | $H_{OR}$ (in) | $V_o$ (in) | $H_{DL}$ (in) | $H_{DR}$ (in) | $V_o$ (in) |
| <input type="checkbox"/> Lower |                |                |               |               |            |               |               |            |

**Date:** \_\_\_\_\_

**Page #** \_\_\_\_ **of** \_\_\_\_

## B.5 Lifting/Lowering Variable Data Form

### Lifting/Lowering Variable (Form E)

Subject # \_\_\_\_\_ Job # \_\_\_\_\_

Normal Carry Height \_\_\_\_\_ in

|     |         |            |                     |                     |                     |                     |     |         |            |                     |                     |                     |                     |
|-----|---------|------------|---------------------|---------------------|---------------------|---------------------|-----|---------|------------|---------------------|---------------------|---------------------|---------------------|
| 1.  | W (lbs) | Width (in) | H <sub>o</sub> (in) | V <sub>o</sub> (in) | H <sub>p</sub> (in) | V <sub>p</sub> (in) | 2.  | W (lbs) | Width (in) | H <sub>o</sub> (in) | V <sub>o</sub> (in) | H <sub>p</sub> (in) | V <sub>p</sub> (in) |
| 3.  | W (lbs) | Width (in) | H <sub>o</sub> (in) | V <sub>o</sub> (in) | H <sub>p</sub> (in) | V <sub>p</sub> (in) | 4.  | W (lbs) | Width (in) | H <sub>o</sub> (in) | V <sub>o</sub> (in) | H <sub>p</sub> (in) | V <sub>p</sub> (in) |
| 5.  | W (lbs) | Width (in) | H <sub>o</sub> (in) | V <sub>o</sub> (in) | H <sub>p</sub> (in) | V <sub>p</sub> (in) | 6.  | W (lbs) | Width (in) | H <sub>o</sub> (in) | V <sub>o</sub> (in) | H <sub>p</sub> (in) | V <sub>p</sub> (in) |
| 7.  | W (lbs) | Width (in) | H <sub>o</sub> (in) | V <sub>o</sub> (in) | H <sub>p</sub> (in) | V <sub>p</sub> (in) | 8.  | W (lbs) | Width (in) | H <sub>o</sub> (in) | V <sub>o</sub> (in) | H <sub>p</sub> (in) | V <sub>p</sub> (in) |
| 9.  | W (lbs) | Width (in) | H <sub>o</sub> (in) | V <sub>o</sub> (in) | H <sub>p</sub> (in) | V <sub>p</sub> (in) | 10. | W (lbs) | Width (in) | H <sub>o</sub> (in) | V <sub>o</sub> (in) | H <sub>p</sub> (in) | V <sub>p</sub> (in) |
| 11. | W (lbs) | Width (in) | H <sub>o</sub> (in) | V <sub>o</sub> (in) | H <sub>p</sub> (in) | V <sub>p</sub> (in) | 12. | W (lbs) | Width (in) | H <sub>o</sub> (in) | V <sub>o</sub> (in) | H <sub>p</sub> (in) | V <sub>p</sub> (in) |
| 13. | W (lbs) | Width (in) | H <sub>o</sub> (in) | V <sub>o</sub> (in) | H <sub>p</sub> (in) | V <sub>p</sub> (in) | 14. | W (lbs) | Width (in) | H <sub>o</sub> (in) | V <sub>o</sub> (in) | H <sub>p</sub> (in) | V <sub>p</sub> (in) |
| 15. | W (lbs) | Width (in) | H <sub>o</sub> (in) | V <sub>o</sub> (in) | H <sub>p</sub> (in) | V <sub>p</sub> (in) | 16. | W (lbs) | Width (in) | H <sub>o</sub> (in) | V <sub>o</sub> (in) | H <sub>p</sub> (in) | V <sub>p</sub> (in) |
| 17. | W (lbs) | Width (in) | H <sub>o</sub> (in) | V <sub>o</sub> (in) | H <sub>p</sub> (in) | V <sub>p</sub> (in) | 18. | W (lbs) | Width (in) | H <sub>o</sub> (in) | V <sub>o</sub> (in) | H <sub>p</sub> (in) | V <sub>p</sub> (in) |
| 19. | W (lbs) | Width (in) | H <sub>o</sub> (in) | V <sub>o</sub> (in) | H <sub>p</sub> (in) | V <sub>p</sub> (in) | 20. | W (lbs) | Width (in) | H <sub>o</sub> (in) | V <sub>o</sub> (in) | H <sub>p</sub> (in) | V <sub>p</sub> (in) |
| 21. | W (lbs) | Width (in) | H <sub>o</sub> (in) | V <sub>o</sub> (in) | H <sub>p</sub> (in) | V <sub>p</sub> (in) | 22. | W (lbs) | Width (in) | H <sub>o</sub> (in) | V <sub>o</sub> (in) | H <sub>p</sub> (in) | V <sub>p</sub> (in) |
| 23. | W (lbs) | Width (in) | H <sub>o</sub> (in) | V <sub>o</sub> (in) | H <sub>p</sub> (in) | V <sub>p</sub> (in) | 24. | W (lbs) | Width (in) | H <sub>o</sub> (in) | V <sub>o</sub> (in) | H <sub>p</sub> (in) | V <sub>p</sub> (in) |

Date: \_\_\_\_\_

Page # \_\_\_\_\_ of \_\_\_\_\_

## B.6. Pushing/Pulling Data Form

**Pushing/Pulling Notes** (Form F)      **Subject #** \_\_\_\_\_      **Job #** \_\_\_\_\_

Description:

|                               |                            |                              |                         |                      |                   |
|-------------------------------|----------------------------|------------------------------|-------------------------|----------------------|-------------------|
| <input type="checkbox"/> Push | <b>Initial Force (lbs)</b> | <b>Sustained Force (lbs)</b> | <b>Hand Height (in)</b> | <b>Distance (ft)</b> | <b>Time (sec)</b> |
| <input type="checkbox"/> Pull |                            |                              |                         |                      |                   |

Description:

|                               |                            |                              |                         |                      |                   |
|-------------------------------|----------------------------|------------------------------|-------------------------|----------------------|-------------------|
| <input type="checkbox"/> Push | <b>Initial Force (lbs)</b> | <b>Sustained Force (lbs)</b> | <b>Hand Height (in)</b> | <b>Distance (ft)</b> | <b>Time (sec)</b> |
| <input type="checkbox"/> Pull |                            |                              |                         |                      |                   |

Description:

|                               |                            |                              |                         |                      |                   |
|-------------------------------|----------------------------|------------------------------|-------------------------|----------------------|-------------------|
| <input type="checkbox"/> Push | <b>Initial Force (lbs)</b> | <b>Sustained Force (lbs)</b> | <b>Hand Height (in)</b> | <b>Distance (ft)</b> | <b>Time (sec)</b> |
| <input type="checkbox"/> Pull |                            |                              |                         |                      |                   |

Description:

|                               |                            |                              |                         |                      |                   |
|-------------------------------|----------------------------|------------------------------|-------------------------|----------------------|-------------------|
| <input type="checkbox"/> Push | <b>Initial Force (lbs)</b> | <b>Sustained Force (lbs)</b> | <b>Hand Height (in)</b> | <b>Distance (ft)</b> | <b>Time (sec)</b> |
| <input type="checkbox"/> Pull |                            |                              |                         |                      |                   |

Description:

|                               |                            |                              |                         |                      |                   |
|-------------------------------|----------------------------|------------------------------|-------------------------|----------------------|-------------------|
| <input type="checkbox"/> Push | <b>Initial Force (lbs)</b> | <b>Sustained Force (lbs)</b> | <b>Hand Height (in)</b> | <b>Distance (ft)</b> | <b>Time (sec)</b> |
| <input type="checkbox"/> Pull |                            |                              |                         |                      |                   |

Description:

|                               |                            |                              |                         |                      |                   |
|-------------------------------|----------------------------|------------------------------|-------------------------|----------------------|-------------------|
| <input type="checkbox"/> Push | <b>Initial Force (lbs)</b> | <b>Sustained Force (lbs)</b> | <b>Hand Height (in)</b> | <b>Distance (ft)</b> | <b>Time (sec)</b> |
| <input type="checkbox"/> Pull |                            |                              |                         |                      |                   |

Description:

|                               |                            |                              |                         |                      |                   |
|-------------------------------|----------------------------|------------------------------|-------------------------|----------------------|-------------------|
| <input type="checkbox"/> Push | <b>Initial Force (lbs)</b> | <b>Sustained Force (lbs)</b> | <b>Hand Height (in)</b> | <b>Distance (ft)</b> | <b>Time (sec)</b> |
| <input type="checkbox"/> Pull |                            |                              |                         |                      |                   |

Description:

|                               |                            |                              |                         |                      |                   |
|-------------------------------|----------------------------|------------------------------|-------------------------|----------------------|-------------------|
| <input type="checkbox"/> Push | <b>Initial Force (lbs)</b> | <b>Sustained Force (lbs)</b> | <b>Hand Height (in)</b> | <b>Distance (ft)</b> | <b>Time (sec)</b> |
| <input type="checkbox"/> Pull |                            |                              |                         |                      |                   |

Description:

|                               |                            |                              |                         |                      |                   |
|-------------------------------|----------------------------|------------------------------|-------------------------|----------------------|-------------------|
| <input type="checkbox"/> Push | <b>Initial Force (lbs)</b> | <b>Sustained Force (lbs)</b> | <b>Hand Height (in)</b> | <b>Distance (ft)</b> | <b>Time (sec)</b> |
| <input type="checkbox"/> Pull |                            |                              |                         |                      |                   |

Description:

|                               |                            |                              |                         |                      |                   |
|-------------------------------|----------------------------|------------------------------|-------------------------|----------------------|-------------------|
| <input type="checkbox"/> Push | <b>Initial Force (lbs)</b> | <b>Sustained Force (lbs)</b> | <b>Hand Height (in)</b> | <b>Distance (ft)</b> | <b>Time (sec)</b> |
| <input type="checkbox"/> Pull |                            |                              |                         |                      |                   |

Description:

|                               |                            |                              |                         |                      |                   |
|-------------------------------|----------------------------|------------------------------|-------------------------|----------------------|-------------------|
| <input type="checkbox"/> Push | <b>Initial Force (lbs)</b> | <b>Sustained Force (lbs)</b> | <b>Hand Height (in)</b> | <b>Distance (ft)</b> | <b>Time (sec)</b> |
| <input type="checkbox"/> Pull |                            |                              |                         |                      |                   |

**Date:** \_\_\_\_\_

**Page #** \_\_\_\_ **of** \_\_\_\_



## B.7. Walking/Carrying Data Form

### Walking/Carrying Notes (Form G) Subject # \_\_\_\_\_ Job # \_\_\_\_\_

Description: \_\_\_\_\_

|                                |                     |                      |                   |
|--------------------------------|---------------------|----------------------|-------------------|
| <input type="checkbox"/> Walk  | <b>Weight (lbs)</b> | <b>Distance (ft)</b> | <b>Time (sec)</b> |
| <input type="checkbox"/> Carry |                     |                      |                   |

Description: \_\_\_\_\_

|                                |                     |                      |                   |
|--------------------------------|---------------------|----------------------|-------------------|
| <input type="checkbox"/> Walk  | <b>Weight (lbs)</b> | <b>Distance (ft)</b> | <b>Time (sec)</b> |
| <input type="checkbox"/> Carry |                     |                      |                   |

Description: \_\_\_\_\_

|                                |                     |                      |                   |
|--------------------------------|---------------------|----------------------|-------------------|
| <input type="checkbox"/> Walk  | <b>Weight (lbs)</b> | <b>Distance (ft)</b> | <b>Time (sec)</b> |
| <input type="checkbox"/> Carry |                     |                      |                   |

Description: \_\_\_\_\_

|                                |                     |                      |                   |
|--------------------------------|---------------------|----------------------|-------------------|
| <input type="checkbox"/> Walk  | <b>Weight (lbs)</b> | <b>Distance (ft)</b> | <b>Time (sec)</b> |
| <input type="checkbox"/> Carry |                     |                      |                   |

Description: \_\_\_\_\_

|                                |                     |                      |                   |
|--------------------------------|---------------------|----------------------|-------------------|
| <input type="checkbox"/> Walk  | <b>Weight (lbs)</b> | <b>Distance (ft)</b> | <b>Time (sec)</b> |
| <input type="checkbox"/> Carry |                     |                      |                   |

Description: \_\_\_\_\_

|                                |                     |                      |                   |
|--------------------------------|---------------------|----------------------|-------------------|
| <input type="checkbox"/> Walk  | <b>Weight (lbs)</b> | <b>Distance (ft)</b> | <b>Time (sec)</b> |
| <input type="checkbox"/> Carry |                     |                      |                   |

Description: \_\_\_\_\_

|                                |                     |                      |                   |
|--------------------------------|---------------------|----------------------|-------------------|
| <input type="checkbox"/> Walk  | <b>Weight (lbs)</b> | <b>Distance (ft)</b> | <b>Time (sec)</b> |
| <input type="checkbox"/> Carry |                     |                      |                   |

Description: \_\_\_\_\_

|                                |                     |                      |                   |
|--------------------------------|---------------------|----------------------|-------------------|
| <input type="checkbox"/> Walk  | <b>Weight (lbs)</b> | <b>Distance (ft)</b> | <b>Time (sec)</b> |
| <input type="checkbox"/> Carry |                     |                      |                   |

Description: \_\_\_\_\_

|                                |                     |                      |                   |
|--------------------------------|---------------------|----------------------|-------------------|
| <input type="checkbox"/> Walk  | <b>Weight (lbs)</b> | <b>Distance (ft)</b> | <b>Time (sec)</b> |
| <input type="checkbox"/> Carry |                     |                      |                   |

Description: \_\_\_\_\_

|                                |                     |                      |                   |
|--------------------------------|---------------------|----------------------|-------------------|
| <input type="checkbox"/> Walk  | <b>Weight (lbs)</b> | <b>Distance (ft)</b> | <b>Time (sec)</b> |
| <input type="checkbox"/> Carry |                     |                      |                   |

Date: \_\_\_\_\_

Page # \_\_\_\_ of \_\_\_\_

# B.8. Lifting/Lowering Tasks Data Form

## Lifting/Lowering Tasks (Combined Form)

Subject # \_\_\_\_\_

Job # \_\_\_\_\_

1. Task # \_\_\_\_\_ 2. LIFT/LOWER Biomechanical Analysis

3. Object Weight: \_\_\_\_\_ lbs 4. Hands: L R B

5. Limb Angles:

|           | Left  |       | Right |       |
|-----------|-------|-------|-------|-------|
|           | Horz. | Vert. | Horz. | Vert. |
| Upper Arm | 0     | 0     | 0     | 0     |
| Lower Arm | 0     | 0     | 0     | 0     |
| Upper Leg | 0     | 0     | 0     | 0     |
| Lower Leg | 0     | 0     | 0     | 0     |

6. Trunk Angles:

|                     |   |
|---------------------|---|
| Flexion             | 0 |
| Axial Rotation R L  | 0 |
| Lateral Bending R L | 0 |

NOTE: Lifting and then lowering are 2 separate tasks (one lifting and one lowering).

1. Task # \_\_\_\_\_ 2. LIFT/LOWER Biomechanical Analysis

3. Object Weight: \_\_\_\_\_ lbs 4. Hands: L R B

5. Limb Angles:

|           | Left  |       | Right |       |
|-----------|-------|-------|-------|-------|
|           | Horz. | Vert. | Horz. | Vert. |
| Upper Arm | 0     | 0     | 0     | 0     |
| Lower Arm | 0     | 0     | 0     | 0     |
| Upper Leg | 0     | 0     | 0     | 0     |
| Lower Leg | 0     | 0     | 0     | 0     |

6. Trunk Angles:

|                     |   |
|---------------------|---|
| Flexion             | 0 |
| Axial Rotation R L  | 0 |
| Lateral Bending R L | 0 |

NOTE: Lifting and then lowering are 2 separate tasks (one lifting and one lowering).

1. Task # \_\_\_\_\_ 2. Description: \_\_\_\_\_

3.  Lift  Lower 4.  Box  Bag  Other

5. Separate Hands:  Yes  No 6.  Even  Uneven |  Stable  Unstable

7. Hands:  Left  Right  Both 8. Grasp:  Good  Fair  Poor

9. Technique:  Stoop  Semi  Squat  Side  Stand

10. Object Dimensions: W \_\_\_\_\_ in, L \_\_\_\_\_ in, H \_\_\_\_\_ in

11. Observation Duration: \_\_\_\_\_ min 12. Number of Lift/Lowers: \_\_\_\_\_

13. Total Weight/Lift: \_\_\_\_\_ lbs SCD?  Yes  No

|                 |                 |                 |                 |
|-----------------|-----------------|-----------------|-----------------|
| V <sub>OL</sub> | V <sub>OR</sub> | V <sub>DL</sub> | V <sub>DR</sub> |
| in              | in              | in              | in              |
| H <sub>OL</sub> | H <sub>OR</sub> | H <sub>DL</sub> | H <sub>DR</sub> |
| in              | in              | in              | in              |
| L <sub>OL</sub> | L <sub>OR</sub> | L <sub>DL</sub> | L <sub>DR</sub> |
| in              | in              | in              | in              |
| D               | A <sub>b</sub>  | A <sub>b</sub>  | A <sub>b</sub>  |
| in              | in              | in              | in              |

1. Task # \_\_\_\_\_ 2. Description: \_\_\_\_\_

3.  Lift  Lower 4.  Box  Bag  Other

5. Separate Hands:  Yes  No 6.  Even  Uneven |  Stable  Unstable

7. Hands:  Left  Right  Both 8. Grasp:  Good  Fair  Poor

9. Technique:  Stoop  Semi  Squat  Side  Stand

10. Object Dimensions: W \_\_\_\_\_ in, L \_\_\_\_\_ in, H \_\_\_\_\_ in

11. Observation Duration: \_\_\_\_\_ min 12. Number of Lift/Lowers: \_\_\_\_\_

13. Total Weight/Lift: \_\_\_\_\_ lbs SCD?  Yes  No

|                 |                 |                 |                 |
|-----------------|-----------------|-----------------|-----------------|
| V <sub>OL</sub> | V <sub>OR</sub> | V <sub>DL</sub> | V <sub>DR</sub> |
| in              | in              | in              | in              |
| H <sub>OL</sub> | H <sub>OR</sub> | H <sub>DL</sub> | H <sub>DR</sub> |
| in              | in              | in              | in              |
| L <sub>OL</sub> | L <sub>OR</sub> | L <sub>DL</sub> | L <sub>DR</sub> |
| in              | in              | in              | in              |
| D               | A <sub>b</sub>  | A <sub>b</sub>  | A <sub>b</sub>  |
| in              | in              | in              | in              |

Date: \_\_\_\_\_

Page # \_\_\_\_\_ of \_\_\_\_\_

Form #: LBLC03222004

# B.9. Pushing/Pulling Tasks Data Form

## Push/Pull Tasks (Combined Form)

Subject # \_\_\_\_\_ Job # \_\_\_\_\_

1. Task # \_\_\_\_\_ 2. PUSH/PULL Biomechanical Analysis

3. Object Weight: \_\_\_\_\_ lbs 4. Hands: L R B

5. Limb Angles:

|           | Left  |       | Right |       |
|-----------|-------|-------|-------|-------|
|           | Horz. | Vert. | Horz. | Vert. |
| Upper Arm | 0     | 0     | 0     | 0     |
| Lower Arm | 0     | 0     | 0     | 0     |
| Upper Leg | 0     | 0     | 0     | 0     |
| Lower Leg | 0     | 0     | 0     | 0     |

6. Trunk Angles:

|                     |   |
|---------------------|---|
| Flexion             | 0 |
| Axial Rotation R L  | 0 |
| Lateral Bending R L | 0 |

1. Task # \_\_\_\_\_ 2. PUSH/PULL Biomechanical Analysis

3. Object Weight: \_\_\_\_\_ lbs 4. Hands: L R B

5. Limb Angles:

|           | Left  |       | Right |       |
|-----------|-------|-------|-------|-------|
|           | Horz. | Vert. | Horz. | Vert. |
| Upper Arm | 0     | 0     | 0     | 0     |
| Lower Arm | 0     | 0     | 0     | 0     |
| Upper Leg | 0     | 0     | 0     | 0     |
| Lower Leg | 0     | 0     | 0     | 0     |

6. Trunk Angles:

|                     |   |
|---------------------|---|
| Flexion             | 0 |
| Axial Rotation R L  | 0 |
| Lateral Bending R L | 0 |

1. Task # \_\_\_\_\_ 2. Description: \_\_\_\_\_

3. Activity:  Push  Pull

4. Type of Cart:  4W Cart  2W Hand Truck  Pallet Jack  
 Box  Other: \_\_\_\_\_

5. Hands:  Left  Right  Both 6. Height of Hands: \_\_\_\_\_ in

7. Posture:  Lean Forward  Lean Back  Lean Side  Stand

8. Distance per Push/Pull: \_\_\_\_\_ ft 9. Time per Push/Pull: \_\_\_\_\_ sec

10. Initial Force: \_\_\_\_\_ lbs 11. Sustained Force: \_\_\_\_\_ lbs

12. Observation Duration: \_\_\_\_\_ min 13. Number of Push/Pulls: \_\_\_\_\_

1. Task # \_\_\_\_\_ 2. Description: \_\_\_\_\_

3. Activity:  Push  Pull

4. Type of Cart:  4W Cart  2W Hand Truck  Pallet Jack  
 Box  Other: \_\_\_\_\_

5. Hands:  Left  Right  Both 6. Height of Hands: \_\_\_\_\_ in

7. Posture:  Lean Forward  Lean Back  Lean Side  Stand

8. Distance per Push/Pull: \_\_\_\_\_ ft 9. Time per Push/Pull: \_\_\_\_\_ sec

10. Initial Force: \_\_\_\_\_ lbs 11. Sustained Force: \_\_\_\_\_ lbs

12. Observation Duration: \_\_\_\_\_ min 13. Number of Push/Pulls: \_\_\_\_\_

Date: \_\_\_\_\_

Page # \_\_\_\_\_ of \_\_\_\_\_

Form #: LBUC03222004

# B.10. Walking/Carrying Tasks Data Form

## Walking/Carrying Tasks

Subject # \_\_\_\_\_ Job # \_\_\_\_\_

1. Task # \_\_\_\_\_ 2. Description: \_\_\_\_\_

3. Activity:  Walk  Carry 14 Hands:  Left  Right  Both

5. Technique:  Waist  Thighs  Side  Other: \_\_\_\_\_

6. Distance per Walk/Carry: \_\_\_\_\_ ft

7. Time per Walk/Carry: \_\_\_\_\_ sec

8. Object:  Box  Bag  Other: \_\_\_\_\_

9. Object Weight: \_\_\_\_\_ lbs

10. Observation Duration: \_\_\_\_\_ min

11. Number of Walk/Carries: \_\_\_\_\_

1. Task # \_\_\_\_\_ 2. Description: \_\_\_\_\_

3. Activity:  Walk  Carry 14 Hands:  Left  Right  Both

5. Technique:  Waist  Thighs  Side  Other: \_\_\_\_\_

6. Distance per Walk/Carry: \_\_\_\_\_ ft

7. Time per Walk/Carry: \_\_\_\_\_ sec

8. Object:  Box  Bag  Other: \_\_\_\_\_

9. Object Weight: \_\_\_\_\_ lbs

10. Observation Duration: \_\_\_\_\_ min

11. Number of Walk/Carries: \_\_\_\_\_

1. Task # \_\_\_\_\_ 2. Description: \_\_\_\_\_

3. Activity:  Walk  Carry 14 Hands:  Left  Right  Both

5. Technique:  Waist  Thighs  Side  Other: \_\_\_\_\_

6. Distance per Walk/Carry: \_\_\_\_\_ ft

7. Time per Walk/Carry: \_\_\_\_\_ sec

8. Object:  Box  Bag  Other: \_\_\_\_\_

9. Object Weight: \_\_\_\_\_ lbs

10. Observation Duration: \_\_\_\_\_ min

11. Number of Walk/Carries: \_\_\_\_\_

1. Task # \_\_\_\_\_ 2. Description: \_\_\_\_\_

3. Activity:  Walk  Carry 14 Hands:  Left  Right  Both

5. Technique:  Waist  Thighs  Side  Other: \_\_\_\_\_

6. Distance per Walk/Carry: \_\_\_\_\_ ft

7. Time per Walk/Carry: \_\_\_\_\_ sec

8. Object:  Box  Bag  Other: \_\_\_\_\_

9. Object Weight: \_\_\_\_\_ lbs

10. Observation Duration: \_\_\_\_\_ min

11. Number of Walk/Carries: \_\_\_\_\_

Date: \_\_\_\_\_

Page # \_\_\_\_\_ of \_\_\_\_\_

Form #: LBW0322004
